# Supplementary material
Source: HighWire-hosted journal article supplement (http://molpharm.aspetjournals.org/highwire/filestream/77124/field_highwire_adjunct_files/0/SingletonSuppFigures.pdf)

**SUPPLEMENTAL TABLE 1: List of shRNAs used for validation.**

| shRNA         | Gene  | Target          | Sequence                                                        |
|---------------|-------|-----------------|-----------------------------------------------------------------|
| TRC0000010342 | ERBB2 | Coding Sequence | CCGGATCACAGGTTACCTATACATCTCGAGA<br>TGTATAGGTAACCTGTGATCTTTTTG   |
| TRC0000039878 | ERBB2 | 3' UTR          | CCGGTGTGAGTATCCAGGCTTTGTACTIONG<br>GTACAAAGCCTGGATACTGACATTTTTG |
| TRC0000010379 | MET   | Coding Sequence | CCGGCATCAGAACCAGAGGCTTGGTCTCGA<br>GACCAAGCCTCTGGTTCTGATGTTTTG   |
| TRC0000196443 | MET   | 3' UTR          | CCGGGTGTGTTGTATGGTCAATAACCTCGAG<br>GTTATTGACCATAACAACACTTTTTG   |
| TRC0000196685 | MET   | Coding Sequence | CCGGGCTGTGAGAATATACTTACCTCGAG<br>GTAAGTGTATATTCTCACAGCTTTTTG    |
| TRC0000040047 | MET   | Coding Sequence | CCGGGCCAGCCTGAATGATGACATTCTCGA<br>GAATGTCATCATTGAGGCTGGCTTTTTG  |

**SUPPLEMENTAL TABLE 2: SLATs (E-value cut off of E value  $\leq 2$ ) in UMSCC25, 584-A2, and CCL30.**

| UMSCC25 |             |                 |          |      |             |                 |          |
|---------|-------------|-----------------|----------|------|-------------|-----------------|----------|
| Rank    | Gene Symbol | p-value [p(wZ)] | E value  | Rank | Gene Symbol | p-value [p(wZ)] | E value  |
| 1       | CLUAP1      | 5.15E-07        | 5.15E-07 | 48   | FHL1        | 4.84E-04        | 2.32E-02 |
| 2       | ZFR         | 8.78E-07        | 1.76E-06 | 49   | RABGGTB     | 5.03E-04        | 2.46E-02 |
| 3       | MET         | 1.94E-06        | 5.83E-06 | 50   | THPO        | 5.28E-04        | 2.64E-02 |
| 4       | MEMO1       | 1.95E-06        | 7.79E-06 | 50   | BCAP29      | 5.28E-04        | 2.64E-02 |
| 5       | NPAT        | 3.00E-06        | 1.50E-05 | 52   | KBTBD4      | 5.28E-04        | 2.75E-02 |
| 6       | EPB41L4B    | 3.18E-06        | 1.91E-05 | 53   | MEX3B       | 5.28E-04        | 2.80E-02 |
| 7       | G2E3        | 3.43E-06        | 2.40E-05 | 54   | EML4        | 5.29E-04        | 2.85E-02 |
| 8       | PSMD13      | 4.10E-06        | 3.28E-05 | 55   | C20orf7     | 5.29E-04        | 2.91E-02 |
| 9       | MUC7        | 5.60E-06        | 5.04E-05 | 56   | GPR126      | 5.29E-04        | 2.96E-02 |
| 10      | ARSD        | 5.67E-06        | 5.67E-05 | 56   | PNPO        | 5.29E-04        | 2.96E-02 |
| 11      | TMEM163     | 1.13E-05        | 1.24E-04 | 58   | TJAP1       | 5.29E-04        | 3.07E-02 |
| 12      | PCTK2       | 1.38E-05        | 1.65E-04 | 58   | SLC26A2     | 5.29E-04        | 3.07E-02 |
| 13      | ANP32E      | 1.38E-05        | 1.80E-04 | 58   | NETO2       | 5.29E-04        | 3.07E-02 |
| 14      | ITGA6       | 2.62E-05        | 3.66E-04 | 61   | MAML3       | 5.29E-04        | 3.23E-02 |
| 15      | C14orf147   | 2.74E-05        | 4.11E-04 | 62   | HLA-DRB3    | 5.30E-04        | 3.29E-02 |
| 16      | MDH1B       | 3.18E-05        | 5.08E-04 | 62   | HLA-DRB1    | 5.30E-04        | 3.29E-02 |
| 17      | SP1         | 3.68E-05        | 6.25E-04 | 62   | HLA-DRB5    | 5.30E-04        | 3.29E-02 |
| 18      | ALDOB       | 4.96E-05        | 8.92E-04 | 62   | SPRYD5      | 5.30E-04        | 3.29E-02 |
| 19      | ANAPC5      | 5.12E-05        | 9.72E-04 | 66   | SYT14L      | 5.30E-04        | 3.50E-02 |
| 20      | FCGR3B      | 5.17E-05        | 1.03E-03 | 67   | DGAT2       | 5.31E-04        | 3.56E-02 |
| 21      | TBXA2R      | 5.39E-05        | 1.13E-03 | 68   | ZNF10       | 5.32E-04        | 3.62E-02 |
| 22      | MT1X        | 5.80E-05        | 1.28E-03 | 69   | ZNF764      | 5.32E-04        | 3.67E-02 |
| 23      | SCRN3       | 6.54E-05        | 1.51E-03 | 70   | E4F1        | 5.32E-04        | 3.73E-02 |
| 24      | PAPOLA      | 7.53E-05        | 1.81E-03 | 70   | NOV         | 5.32E-04        | 3.73E-02 |
| 25      | FGFR1OP2    | 7.54E-05        | 1.88E-03 | 70   | SSBP3       | 5.32E-04        | 3.73E-02 |
| 26      | KCTD14      | 1.06E-04        | 2.75E-03 | 73   | COL6A1      | 5.33E-04        | 3.89E-02 |
| 27      | LLGL2       | 1.39E-04        | 3.76E-03 | 74   | PLEKHA6     | 5.33E-04        | 3.94E-02 |
| 28      | PYGM        | 1.45E-04        | 4.06E-03 | 75   | TMEM196     | 5.33E-04        | 4.00E-02 |
| 29      | MF12        | 1.52E-04        | 4.40E-03 | 76   | DCN         | 5.33E-04        | 4.05E-02 |
| 30      | FAM136A     | 1.67E-04        | 5.02E-03 | 77   | ZNF280B     | 5.34E-04        | 4.11E-02 |
| 31      | ZNF787      | 1.68E-04        | 5.22E-03 | 78   | PDCD11      | 5.34E-04        | 4.17E-02 |
| 32      | FPR2        | 1.89E-04        | 6.04E-03 | 79   | CXADR       | 5.35E-04        | 4.22E-02 |
| 33      | TMED5       | 2.07E-04        | 6.83E-03 | 79   | HLA-G       | 5.35E-04        | 4.22E-02 |
| 34      | PTP4A1      | 2.10E-04        | 7.16E-03 | 81   | RUNX2       | 5.35E-04        | 4.33E-02 |
| 35      | LSM4        | 2.16E-04        | 7.57E-03 | 82   | ERBB2       | 5.35E-04        | 4.39E-02 |
| 36      | FARSA       | 2.26E-04        | 8.13E-03 | 82   | TRIB2       | 5.35E-04        | 4.39E-02 |
| 37      | AGRN        | 2.37E-04        | 8.76E-03 | 84   | C12orf48    | 5.36E-04        | 4.50E-02 |
| 38      | FAM172A     | 2.52E-04        | 9.58E-03 | 85   | MAST1       | 5.37E-04        | 4.56E-02 |
| 39      | PTPN11      | 2.58E-04        | 1.01E-02 | 86   | THAP10      | 5.37E-04        | 4.62E-02 |
| 40      | TBX5        | 2.74E-04        | 1.10E-02 | 87   | BCL11A      | 5.38E-04        | 4.68E-02 |
| 41      | MBD6        | 3.55E-04        | 1.46E-02 | 88   | CCDC88A     | 5.38E-04        | 4.74E-02 |
| 42      | TRAM1       | 3.99E-04        | 1.68E-02 | 89   | MARS2       | 5.39E-04        | 4.80E-02 |
| 43      | VEGFA       | 4.12E-04        | 1.77E-02 | 90   | C3AR1       | 5.40E-04        | 4.86E-02 |
| 44      | ZNF79       | 4.13E-04        | 1.82E-02 | 91   | KIAA0892    | 5.41E-04        | 4.92E-02 |
| 45      | SCOC        | 4.14E-04        | 1.86E-02 | 92   | POLD3       | 5.41E-04        | 4.98E-02 |
| 46      | SEMA4D      | 4.42E-04        | 2.03E-02 | 93   | C2orf52     | 5.44E-04        | 5.06E-02 |
| 47      | CALM1       | 4.44E-04        | 2.09E-02 | 94   | FSTL5       | 5.44E-04        | 5.12E-02 |

| UMSCC25 |             |                 |          |      |             |                 |          |
|---------|-------------|-----------------|----------|------|-------------|-----------------|----------|
| Rank    | Gene Symbol | p-value [p(wZ)] | E value  | Rank | Gene Symbol | p-value [p(wZ)] | E value  |
| 94      | ZNF511      | 5.44E-04        | 5.12E-02 | 142  | PLEKHO1     | 5.79E-04        | 8.22E-02 |
| 94      | CD55        | 5.44E-04        | 5.12E-02 | 143  | ZFP64       | 5.83E-04        | 8.33E-02 |
| 94      | ST5         | 5.44E-04        | 5.12E-02 | 144  | RPL28       | 5.83E-04        | 8.39E-02 |
| 94      | NYX         | 5.44E-04        | 5.12E-02 | 145  | C5orf45     | 5.86E-04        | 8.50E-02 |
| 99      | FLJ22662    | 5.45E-04        | 5.39E-02 | 145  | SQSTM1      | 5.86E-04        | 8.50E-02 |
| 100     | BCAS2       | 5.46E-04        | 5.46E-02 | 147  | COL5A3      | 5.88E-04        | 8.65E-02 |
| 100     | FRAT2       | 5.46E-04        | 5.46E-02 | 148  | CDV3        | 5.92E-04        | 8.76E-02 |
| 102     | MAP7        | 5.46E-04        | 5.57E-02 | 148  | SF3B14      | 5.92E-04        | 8.76E-02 |
| 103     | KRT222P     | 5.46E-04        | 5.63E-02 | 150  | HGD         | 5.95E-04        | 8.92E-02 |
| 104     | AGPAT9      | 5.46E-04        | 5.68E-02 | 150  | NIACR2      | 5.95E-04        | 8.92E-02 |
| 105     | FAT2        | 5.46E-04        | 5.74E-02 | 150  | RNF20       | 5.95E-04        | 8.92E-02 |
| 106     | ITIH5       | 5.46E-04        | 5.79E-02 | 153  | VWA5A       | 5.97E-04        | 9.13E-02 |
| 106     | RAB3IP      | 5.46E-04        | 5.79E-02 | 153  | PNPLA8      | 5.97E-04        | 9.13E-02 |
| 108     | CYP2A7      | 5.48E-04        | 5.91E-02 | 155  | FOXN3       | 6.00E-04        | 9.30E-02 |
| 109     | FBXO31      | 5.48E-04        | 5.98E-02 | 156  | LFNG        | 6.00E-04        | 9.37E-02 |
| 109     | JCLN        | 5.48E-04        | 5.98E-02 | 157  | PRKAB2      | 6.01E-04        | 9.44E-02 |
| 109     | RPL24       | 5.48E-04        | 5.98E-02 | 158  | CISH        | 6.07E-04        | 9.59E-02 |
| 112     | MLH3        | 5.52E-04        | 6.18E-02 | 159  | ACOX3       | 6.08E-04        | 9.66E-02 |
| 113     | TGOLN2      | 5.53E-04        | 6.25E-02 | 159  | FSCN3       | 6.08E-04        | 9.66E-02 |
| 114     | C21orf62    | 5.54E-04        | 6.31E-02 | 161  | PIP4K2C     | 6.09E-04        | 9.80E-02 |
| 115     | ZNF407      | 5.55E-04        | 6.38E-02 | 162  | SORBS2      | 6.11E-04        | 9.89E-02 |
| 116     | KIR2DL1     | 5.56E-04        | 6.45E-02 | 162  | SKP2        | 6.11E-04        | 9.89E-02 |
| 116     | GTF2I       | 5.56E-04        | 6.45E-02 | 164  | MGLL        | 6.11E-04        | 0.1003   |
| 116     | KIR2DL2     | 5.56E-04        | 6.45E-02 | 165  | CEACAM7     | 6.12E-04        | 0.1010   |
| 119     | ARL6IP5     | 5.57E-04        | 6.63E-02 | 166  | GNB4        | 6.12E-04        | 0.1016   |
| 120     | YAF2        | 5.57E-04        | 6.69E-02 | 167  | COL5A2      | 6.12E-04        | 0.1023   |
| 121     | RSF1        | 5.59E-04        | 6.76E-02 | 168  | PHB2        | 6.15E-04        | 0.1033   |
| 122     | MMP14       | 5.63E-04        | 6.87E-02 | 169  | PTBP2       | 6.16E-04        | 0.1041   |
| 123     | PPAP2B      | 5.64E-04        | 6.94E-02 | 170  | DCUN1D1     | 6.17E-04        | 0.1048   |
| 123     | BCOR        | 5.64E-04        | 6.94E-02 | 170  | OSTM1       | 6.17E-04        | 0.1048   |
| 125     | ABTB2       | 5.65E-04        | 7.06E-02 | 172  | CLCN7       | 6.17E-04        | 0.1061   |
| 125     | OGFR        | 5.65E-04        | 7.06E-02 | 173  | PTP4A2      | 6.21E-04        | 0.1075   |
| 127     | TMPO        | 5.67E-04        | 7.20E-02 | 173  | TACR2       | 6.21E-04        | 0.1075   |
| 128     | FASTKD1     | 5.70E-04        | 7.30E-02 | 173  | WWC2        | 6.21E-04        | 0.1075   |
| 129     | DOK7        | 5.71E-04        | 7.36E-02 | 176  | GNRHR       | 6.26E-04        | 0.1101   |
| 130     | TRIOBP      | 5.71E-04        | 7.42E-02 | 176  | PCDHB5      | 6.26E-04        | 0.1101   |
| 130     | PDE1A       | 5.71E-04        | 7.42E-02 | 178  | CBX3        | 6.26E-04        | 0.1114   |
| 132     | TRAM2       | 5.71E-04        | 7.54E-02 | 179  | PDS5A       | 6.30E-04        | 0.1127   |
| 133     | THAP11      | 5.72E-04        | 7.61E-02 | 180  | FAM62B      | 6.34E-04        | 0.1141   |
| 134     | CNOT6L      | 5.74E-04        | 7.69E-02 | 180  | CRYAA       | 6.34E-04        | 0.1141   |
| 134     | TEX2        | 5.74E-04        | 7.69E-02 | 182  | TRIM27      | 6.36E-04        | 0.1157   |
| 136     | SEPT6       | 5.75E-04        | 7.82E-02 | 183  | MLXIP       | 6.36E-04        | 0.1165   |
| 137     | HSP90B1     | 5.76E-04        | 7.90E-02 | 184  | HRASLS      | 6.40E-04        | 0.1178   |
| 138     | HNRNPR      | 5.76E-04        | 7.96E-02 | 185  | AVL9        | 6.40E-04        | 0.1185   |
| 138     | PITPNM2     | 5.76E-04        | 7.96E-02 | 185  | IGF2BP3     | 6.40E-04        | 0.1185   |
| 140     | NFIB        | 5.77E-04        | 8.08E-02 | 187  | CSNK1G2     | 6.42E-04        | 0.1200   |
| 141     | SYT14       | 5.78E-04        | 8.16E-02 | 188  | EPO         | 6.47E-04        | 0.1216   |

| UMSCC25 |             |                 |         |      |             |                 |         |
|---------|-------------|-----------------|---------|------|-------------|-----------------|---------|
| Rank    | Gene Symbol | p-value [p(wZ)] | E value | Rank | Gene Symbol | p-value [p(wZ)] | E value |
| 188     | PDZRN3      | 6.47E-04        | 0.1216  | 234  | SLC38A3     | 7.58E-04        | 0.1774  |
| 188     | CBX7        | 6.47E-04        | 0.1216  | 234  | CXorf48     | 7.58E-04        | 0.1774  |
| 188     | PHF8        | 6.47E-04        | 0.1216  | 234  | ATF5        | 7.58E-04        | 0.1774  |
| 188     | SLC1A4      | 6.47E-04        | 0.1216  | 239  | SNCA        | 7.59E-04        | 0.1813  |
| 193     | TMEM49      | 6.53E-04        | 0.1261  | 240  | SRR         | 7.63E-04        | 0.1832  |
| 193     | CC2D1A      | 6.53E-04        | 0.1261  | 240  | TSR1        | 7.63E-04        | 0.1832  |
| 195     | PPIG        | 6.53E-04        | 0.1274  | 242  | SHB         | 7.65E-04        | 0.1851  |
| 196     | SNX25       | 6.59E-04        | 0.1291  | 243  | PCDHGA1     | 7.71E-04        | 0.1873  |
| 197     | RAB9A       | 6.59E-04        | 0.1299  | 244  | GNL3        | 7.73E-04        | 0.1886  |
| 198     | PFTK1       | 6.60E-04        | 0.1307  | 244  | KCNQ5       | 7.73E-04        | 0.1886  |
| 198     | NCLN        | 6.60E-04        | 0.1307  | 244  | ST3GAL3     | 7.73E-04        | 0.1886  |
| 198     | TMEM53      | 6.60E-04        | 0.1307  | 244  | CACYBP      | 7.73E-04        | 0.1886  |
| 201     | RNF114      | 6.66E-04        | 0.1339  | 244  | VGLL4       | 7.73E-04        | 0.1886  |
| 202     | DHX8        | 6.67E-04        | 0.1348  | 249  | PSME3       | 7.79E-04        | 0.1939  |
| 203     | USP38       | 6.68E-04        | 0.1355  | 250  | ISY1        | 7.79E-04        | 0.1948  |
| 204     | TINAGL1     | 6.75E-04        | 0.1377  | 250  | MED17       | 7.79E-04        | 0.1948  |
| 205     | PIP5K1A     | 6.77E-04        | 0.1387  | 252  | TTC22       | 7.82E-04        | 0.1970  |
| 206     | PCM1        | 6.81E-04        | 0.1403  | 253  | ICA1L       | 7.82E-04        | 0.1978  |
| 207     | SPIN2B      | 6.82E-04        | 0.1411  | 254  | ATF6B       | 7.90E-04        | 0.2006  |
| 207     | SPIN2A      | 6.82E-04        | 0.1411  | 255  | UTRN        | 7.90E-04        | 0.2014  |
| 209     | OR5L1       | 6.86E-04        | 0.1435  | 256  | NET1        | 7.92E-04        | 0.2028  |
| 209     | OR5L2       | 6.86E-04        | 0.1435  | 257  | EHD1        | 7.94E-04        | 0.2041  |
| 209     | REV1        | 6.86E-04        | 0.1435  | 258  | SPAM1       | 7.95E-04        | 0.2051  |
| 212     | TAF6        | 6.87E-04        | 0.1457  | 259  | MLLT10      | 8.03E-04        | 0.2080  |
| 213     | DPY19L4     | 6.90E-04        | 0.1470  | 260  | STRADB      | 8.08E-04        | 0.2102  |
| 214     | PDLIM7      | 6.91E-04        | 0.1478  | 261  | ARL15       | 8.10E-04        | 0.2115  |
| 215     | KCNQ1       | 6.98E-04        | 0.1502  | 262  | DECR2       | 8.14E-04        | 0.2132  |
| 216     | LATS2       | 7.09E-04        | 0.1532  | 262  | ALOX15B     | 8.14E-04        | 0.2132  |
| 216     | PLA2G2E     | 7.09E-04        | 0.1532  | 264  | AP1S2       | 8.30E-04        | 0.2191  |
| 218     | PPAT        | 7.17E-04        | 0.1562  | 264  | ZBTB41      | 8.30E-04        | 0.2191  |
| 219     | NFX1        | 7.18E-04        | 0.1573  | 264  | ZNF19       | 8.30E-04        | 0.2191  |
| 220     | KREMEN2     | 7.19E-04        | 0.1582  | 264  | KAZALD1     | 8.30E-04        | 0.2191  |
| 220     | RAB1A       | 7.19E-04        | 0.1582  | 268  | TM9SF4      | 8.33E-04        | 0.2232  |
| 220     | LRP4        | 7.19E-04        | 0.1582  | 269  | IL15RA      | 8.33E-04        | 0.2242  |
| 223     | C1orf116    | 7.23E-04        | 0.1613  | 270  | ZNF160      | 8.41E-04        | 0.2271  |
| 224     | HEXIM1      | 7.31E-04        | 0.1638  | 271  | ZNF804A     | 8.43E-04        | 0.2285  |
| 225     | FNDC3B      | 7.32E-04        | 0.1647  | 272  | SLC11A2     | 8.51E-04        | 0.2314  |
| 225     | AQP1        | 7.32E-04        | 0.1647  | 273  | NSUN7       | 8.53E-04        | 0.2327  |
| 227     | RHOQ        | 7.32E-04        | 0.1663  | 274  | HISPPD2A    | 8.57E-04        | 0.2349  |
| 228     | P2RY14      | 7.40E-04        | 0.1688  | 274  | MYOZ3       | 8.57E-04        | 0.2349  |
| 229     | SERP1       | 7.42E-04        | 0.1700  | 276  | LUZP2       | 8.58E-04        | 0.2369  |
| 230     | P4HTM       | 7.45E-04        | 0.1714  | 277  | FHOD3       | 8.61E-04        | 0.2385  |
| 230     | PDX1        | 7.45E-04        | 0.1714  | 278  | SLC2A12     | 8.73E-04        | 0.2428  |
| 230     | HIF3A       | 7.45E-04        | 0.1714  | 279  | MC3R        | 8.77E-04        | 0.2448  |
| 233     | KCNJ1       | 7.54E-04        | 0.1758  | 280  | ATM         | 8.84E-04        | 0.2475  |
| 234     | RPL3        | 7.58E-04        | 0.1774  | 280  | NBS         | 8.84E-04        | 0.2475  |
| 234     | CSNK2A1     | 7.58E-04        | 0.1774  | 280  | LRR61       | 8.84E-04        | 0.2475  |

Singleton, Kim, Hinz, Marek, Casas-Selves, Hatheway, Tan, DeGregori and Heasley. A Receptor Tyrosine Kinase Network Comprised of FGFRs, EGFR, ERBB2 and MET Drives Growth and Survival of Head and Neck Squamous Carcinoma Cell Lines. MOLPHARM #084111

| UMSCC25 |             |                 |         |      |             |                 |         |
|---------|-------------|-----------------|---------|------|-------------|-----------------|---------|
| Rank    | Gene Symbol | p-value [p(wZ)] | E value | Rank | Gene Symbol | p-value [p(wZ)] | E value |
| 280     | NBN         | 8.84E-04        | 0.2475  | 330  | C12orf41    | 1.14E-03        | 0.3766  |
| 284     | PGRMC1      | 8.91E-04        | 0.2530  | 330  | P76         | 1.14E-03        | 0.3766  |
| 285     | CHRNA3      | 9.10E-04        | 0.2594  | 332  | ZNF184      | 1.14E-03        | 0.3792  |
| 286     | C22orf29    | 9.12E-04        | 0.2609  | 333  | ADRBK1      | 1.15E-03        | 0.3817  |
| 287     | LCE1E       | 9.12E-04        | 0.2619  | 334  | C20orf20    | 1.15E-03        | 0.3836  |
| 287     | OGT         | 9.12E-04        | 0.2619  | 335  | DUSP6       | 1.20E-03        | 0.4016  |
| 287     | STAT2       | 9.12E-04        | 0.2619  | 336  | PSME4       | 1.20E-03        | 0.4033  |
| 290     | LRRRC66     | 9.25E-04        | 0.2683  | 337  | SERPINB3    | 1.20E-03        | 0.4047  |
| 290     | RUSC2       | 9.25E-04        | 0.2683  | 338  | PIM2        | 1.21E-03        | 0.4073  |
| 292     | PIAS2       | 9.40E-04        | 0.2745  | 339  | NUBPL       | 1.21E-03        | 0.4114  |
| 293     | ACTR8       | 9.45E-04        | 0.2770  | 339  | TRPS1       | 1.21E-03        | 0.4114  |
| 293     | SMURF2      | 9.45E-04        | 0.2770  | 339  | CYP2C19     | 1.21E-03        | 0.4114  |
| 293     | COX5A       | 9.45E-04        | 0.2770  | 339  | ARFIP1      | 1.21E-03        | 0.4114  |
| 293     | ARMC10      | 9.45E-04        | 0.2770  | 339  | RASGRP2     | 1.21E-03        | 0.4114  |
| 293     | PDE4C       | 9.45E-04        | 0.2770  | 339  | FAM35A      | 1.21E-03        | 0.4114  |
| 298     | CNGA3       | 9.46E-04        | 0.2819  | 345  | TBX2        | 1.22E-03        | 0.4199  |
| 298     | HTR5A       | 9.46E-04        | 0.2819  | 346  | MFF         | 1.23E-03        | 0.4257  |
| 300     | ADCY7       | 9.66E-04        | 0.2899  | 347  | ENOX2       | 1.25E-03        | 0.4331  |
| 301     | ATPAF2      | 9.68E-04        | 0.2914  | 348  | CDK10       | 1.26E-03        | 0.4382  |
| 302     | SLC2A4RG    | 9.69E-04        | 0.2925  | 349  | HIF1AN      | 1.27E-03        | 0.4448  |
| 303     | AIFM1       | 9.83E-04        | 0.2979  | 350  | SECISBP2    | 1.28E-03        | 0.4464  |
| 303     | KRT19       | 9.83E-04        | 0.2979  | 351  | DNAH7       | 1.30E-03        | 0.4565  |
| 305     | NR5A2       | 9.88E-04        | 0.3013  | 352  | PRKG2       | 1.30E-03        | 0.4579  |
| 305     | LEPROT      | 9.88E-04        | 0.3013  | 353  | SLC1A1      | 1.30E-03        | 0.4603  |
| 307     | CPEB3       | 9.94E-04        | 0.3050  | 354  | TOX4        | 1.31E-03        | 0.4635  |
| 308     | LOC57228    | 9.94E-04        | 0.3063  | 354  | CD300A      | 1.31E-03        | 0.4635  |
| 309     | GJD3        | 1.00E-03        | 0.3092  | 354  | BCAR3       | 1.31E-03        | 0.4635  |
| 310     | STAB1       | 1.01E-03        | 0.3136  | 354  | TAF6L       | 1.31E-03        | 0.4635  |
| 311     | FANCC       | 1.02E-03        | 0.3161  | 354  | MAG         | 1.31E-03        | 0.4635  |
| 311     | BST1        | 1.02E-03        | 0.3161  | 359  | SNX26       | 1.33E-03        | 0.4786  |
| 311     | ARHGDI3     | 1.02E-03        | 0.3161  | 360  | PEBP1       | 1.33E-03        | 0.4806  |
| 311     | ADA         | 1.02E-03        | 0.3161  | 361  | HTR3A       | 1.34E-03        | 0.4852  |
| 315     | CENPB       | 1.02E-03        | 0.3228  | 362  | FBXO24      | 1.38E-03        | 0.4989  |
| 315     | UGT2B15     | 1.02E-03        | 0.3228  | 363  | PIGF        | 1.38E-03        | 0.5026  |
| 315     | PJA1        | 1.02E-03        | 0.3228  | 364  | CYP2C9      | 1.39E-03        | 0.5046  |
| 318     | CUL3        | 1.05E-03        | 0.3330  | 365  | RBM39       | 1.39E-03        | 0.5065  |
| 319     | CALCB       | 1.07E-03        | 0.3410  | 366  | CDC2L1      | 1.42E-03        | 0.5203  |
| 320     | CCDC117     | 1.08E-03        | 0.3455  | 366  | CDC2L2      | 1.42E-03        | 0.5203  |
| 320     | BIVM        | 1.08E-03        | 0.3455  | 368  | MIPOL1      | 1.43E-03        | 0.5245  |
| 320     | TUBGCP5     | 1.08E-03        | 0.3455  | 368  | ZC3HAV1L    | 1.43E-03        | 0.5245  |
| 320     | ETS2        | 1.08E-03        | 0.3455  | 370  | GPR18       | 1.45E-03        | 0.5374  |
| 320     | AQP4        | 1.08E-03        | 0.3455  | 371  | MSRB2       | 1.50E-03        | 0.5581  |
| 320     | GABRG1      | 1.08E-03        | 0.3455  | 372  | HMGB1       | 1.53E-03        | 0.5678  |
| 320     | TRPC4AP     | 1.08E-03        | 0.3455  | 372  | HMGB1L1     | 1.53E-03        | 0.5678  |
| 327     | STAT1       | 1.09E-03        | 0.3569  | 372  | SP100       | 1.53E-03        | 0.5678  |
| 328     | GFOD1       | 1.10E-03        | 0.3622  | 372  | BAT4        | 1.53E-03        | 0.5678  |
| 329     | PHF6        | 1.11E-03        | 0.3647  | 372  | LSM1        | 1.53E-03        | 0.5678  |

Singleton, Kim, Hinz, Marek, Casas-Selves, Hatheway, Tan, DeGregori and Heasley. A Receptor Tyrosine Kinase Network Comprised of FGFRs, EGFR, ERBB2 and MET Drives Growth and Survival of Head and Neck Squamous Carcinoma Cell Lines. MOLPHARM #084111

| UMSCC25 |               |                 |         |      |             |                 |         |
|---------|---------------|-----------------|---------|------|-------------|-----------------|---------|
| Rank    | Gene Symbol   | p-value [p(wZ)] | E value | Rank | Gene Symbol | p-value [p(wZ)] | E value |
| 377     | LRRC50        | 1.53E-03        | 0.5768  | 424  | CHKA        | 1.92E-03        | 0.8123  |
| 378     | WDR17         | 1.53E-03        | 0.5798  | 425  | SUPT6H      | 1.93E-03        | 0.8195  |
| 379     | TMEM14C       | 1.54E-03        | 0.5824  | 426  | CBLC        | 1.95E-03        | 0.8326  |
| 380     | ECHDC1        | 1.55E-03        | 0.5890  | 427  | NOP56       | 1.96E-03        | 0.8364  |
| 381     | UBOX5         | 1.56E-03        | 0.5928  | 427  | ATP5SL      | 1.96E-03        | 0.8364  |
| 381     | C16orf72      | 1.56E-03        | 0.5928  | 429  | FUSIP1      | 1.99E-03        | 0.8519  |
| 381     | SHMT2         | 1.56E-03        | 0.5928  | 430  | MGAT1       | 2.04E-03        | 0.8757  |
| 381     | MED8          | 1.56E-03        | 0.5928  | 431  | KRCC1       | 2.04E-03        | 0.8798  |
| 381     | CACNA1H       | 1.56E-03        | 0.5928  | 432  | NEDD4       | 2.11E-03        | 0.9122  |
| 381     | GALNT2        | 1.56E-03        | 0.5928  | 432  | CST1        | 2.11E-03        | 0.9122  |
| 381     | SOX2          | 1.56E-03        | 0.5928  | 432  | RUNDC3B     | 2.11E-03        | 0.9122  |
| 381     | CFH           | 1.56E-03        | 0.5928  | 432  | FBXL8       | 2.11E-03        | 0.9122  |
| 381     | RPSA          | 1.56E-03        | 0.5928  | 432  | TIMM44      | 2.11E-03        | 0.9122  |
| 390     | EYA3          | 1.57E-03        | 0.6119  | 432  | HSD17B7     | 2.11E-03        | 0.9122  |
| 391     | FTHL17        | 1.61E-03        | 0.6276  | 432  | OR51E2      | 2.11E-03        | 0.9122  |
| 392     | FAM134B       | 1.62E-03        | 0.6350  | 432  | GATAD1      | 2.11E-03        | 0.9122  |
| 393     | GRLF1         | 1.68E-03        | 0.6587  | 432  | FGFRL1      | 2.11E-03        | 0.9122  |
| 394     | TRPV2         | 1.68E-03        | 0.6614  | 432  | DENR        | 2.11E-03        | 0.9122  |
| 394     | PDIA2         | 1.68E-03        | 0.6614  | 432  | MS4A7       | 2.11E-03        | 0.9122  |
| 396     | NME1-NME2     | 1.68E-03        | 0.6654  | 443  | OASL        | 2.12E-03        | 0.9386  |
| 396     | NME1          | 1.68E-03        | 0.6654  | 444  | PRRT3       | 2.18E-03        | 0.9665  |
| 398     | SETDB2        | 1.70E-03        | 0.6748  | 444  | C12orf54    | 2.18E-03        | 0.9665  |
| 399     | RTN4IP1       | 1.70E-03        | 0.6784  | 446  | UFM1        | 2.21E-03        | 0.9852  |
| 399     | FBLIM1        | 1.70E-03        | 0.6784  | 447  | RACGAP1     | 2.22E-03        | 0.9914  |
| 399     | ZSCAN2        | 1.70E-03        | 0.6784  | 448  | CABC1       | 2.22E-03        | 0.9951  |
| 399     | ROD1          | 1.70E-03        | 0.6784  | 449  | HFE         | 2.25E-03        | 1.0115  |
| 399     | GABRA1        | 1.70E-03        | 0.6784  | 450  | PRUNE       | 2.27E-03        | 1.0193  |
| 399     | MUTED         | 1.70E-03        | 0.6784  | 451  | MCAM        | 2.29E-03        | 1.0316  |
| 405     | CCDC90A       | 1.72E-03        | 0.6972  | 452  | APLP2       | 2.32E-03        | 1.0498  |
| 406     | OFD1          | 1.73E-03        | 0.7034  | 453  | H2AFB2      | 2.32E-03        | 1.0522  |
| 406     | EDEM3         | 1.73E-03        | 0.7034  | 453  | H2AFB3      | 2.32E-03        | 1.0522  |
| 408     | ATP6V0E1      | 1.74E-03        | 0.7080  | 455  | ADAMTS2     | 2.34E-03        | 1.0646  |
| 409     | NIN           | 1.77E-03        | 0.7229  | 456  | RYBP        | 2.34E-03        | 1.0686  |
| 410     | NR2F2         | 1.78E-03        | 0.7312  | 457  | CACNB3      | 2.35E-03        | 1.0717  |
| 411     | SMEK1         | 1.80E-03        | 0.7382  | 458  | MBD4        | 2.36E-03        | 1.0810  |
| 412     | NT5C1B        | 1.82E-03        | 0.7482  | 459  | H2AFX       | 2.39E-03        | 1.0981  |
| 413     | HTRA1         | 1.82E-03        | 0.7504  | 460  | LMAN1       | 2.39E-03        | 1.1006  |
| 414     | RECQL         | 1.82E-03        | 0.7539  | 460  | ZNF446      | 2.39E-03        | 1.1006  |
| 415     | ZNF286A       | 1.83E-03        | 0.7582  | 460  | AK7         | 2.39E-03        | 1.1006  |
| 416     | DKFZP564O0823 | 1.83E-03        | 0.7623  | 460  | RTP4        | 2.39E-03        | 1.1006  |
| 417     | SPG7          | 1.84E-03        | 0.7677  | 460  | SP140L      | 2.39E-03        | 1.1006  |
| 417     | IFI44         | 1.84E-03        | 0.7677  | 460  | ACTR10      | 2.39E-03        | 1.1006  |
| 419     | SLAMF7        | 1.85E-03        | 0.7731  | 460  | RWDD2B      | 2.39E-03        | 1.1006  |
| 420     | ANXA10        | 1.87E-03        | 0.7851  | 460  | GRM7        | 2.39E-03        | 1.1006  |
| 421     | ANK1          | 1.87E-03        | 0.7892  | 460  | C7orf58     | 2.39E-03        | 1.1006  |
| 422     | PSAT1         | 1.88E-03        | 0.7926  | 460  | ZNF644      | 2.39E-03        | 1.1006  |
| 422     | IRAK4         | 1.88E-03        | 0.7926  | 470  | IL17B       | 2.42E-03        | 1.1359  |

Singleton, Kim, Hinz, Marek, Casas-Selves, Hatheway, Tan, DeGregori and Heasley. A Receptor Tyrosine Kinase Network Comprised of FGFRs, EGFR, ERBB2 and MET Drives Growth and Survival of Head and Neck Squamous Carcinoma Cell Lines. MOLPHARM #084111

| UMSCC25 |             |                 |         |      |             |                 |         |
|---------|-------------|-----------------|---------|------|-------------|-----------------|---------|
| Rank    | Gene Symbol | p-value [p(wZ)] | E value | Rank | Gene Symbol | p-value [p(wZ)] | E value |
| 471     | GPRC5B      | 2.47E-03        | 1.1637  | 518  | DDX19A      | 3.27E-03        | 1.6952  |
| 472     | NCKAP1L     | 2.51E-03        | 1.1824  | 519  | FGR         | 3.34E-03        | 1.7315  |
| 473     | MT1F        | 2.51E-03        | 1.1886  | 520  | CD81        | 3.34E-03        | 1.7383  |
| 474     | IGF1        | 2.54E-03        | 1.2026  | 521  | NR1H2       | 3.40E-03        | 1.7738  |
| 475     | PDCD1LG2    | 2.56E-03        | 1.2156  | 522  | GBP3        | 3.46E-03        | 1.8061  |
| 475     | RAC3        | 2.56E-03        | 1.2156  | 523  | PTK2        | 3.49E-03        | 1.8231  |
| 477     | DBC1        | 2.57E-03        | 1.2260  | 523  | YWHAZ       | 3.49E-03        | 1.8231  |
| 478     | FBXO9       | 2.62E-03        | 1.2546  | 523  | GFRA1       | 3.49E-03        | 1.8231  |
| 479     | PEX3        | 2.63E-03        | 1.2615  | 523  | ATP2A1      | 3.49E-03        | 1.8231  |
| 480     | C18orf54    | 2.67E-03        | 1.2814  | 527  | MFN2        | 3.53E-03        | 1.8589  |
| 481     | SELENBP1    | 2.72E-03        | 1.3086  | 527  | C9orf5      | 3.53E-03        | 1.8589  |
| 481     | RALA        | 2.72E-03        | 1.3086  | 527  | CASC1       | 3.53E-03        | 1.8589  |
| 483     | BAZ2A       | 2.73E-03        | 1.3187  | 527  | JMJD2A      | 3.53E-03        | 1.8589  |
| 484     | TIMM8B      | 2.74E-03        | 1.3260  | 531  | SLC35E3     | 3.55E-03        | 1.8855  |
| 485     | PPFIBP1     | 2.74E-03        | 1.3293  | 532  | ESR1        | 3.55E-03        | 1.8908  |
| 486     | ARHGEF9     | 2.75E-03        | 1.3378  | 533  | PROK1       | 3.55E-03        | 1.8945  |
| 486     | ACLY        | 2.75E-03        | 1.3378  | 534  | ENTPD6      | 3.57E-03        | 1.9054  |
| 486     | ZMYND10     | 2.75E-03        | 1.3378  | 535  | REST        | 3.59E-03        | 1.9207  |
| 486     | SIRT4       | 2.75E-03        | 1.3378  | 536  | TNS1        | 3.67E-03        | 1.9681  |
| 486     | EDF1        | 2.75E-03        | 1.3378  | 537  | GMPR        | 3.70E-03        | 1.9887  |
| 486     | UBQLN1      | 2.75E-03        | 1.3378  | 537  | RARG        | 3.70E-03        | 1.9887  |
| 486     | POLR2C      | 2.75E-03        | 1.3378  |      |             |                 |         |
| 486     | NDUFS8      | 2.75E-03        | 1.3378  |      |             |                 |         |
| 486     | ZNF771      | 2.75E-03        | 1.3378  |      |             |                 |         |
| 495     | CENPT       | 2.76E-03        | 1.3649  |      |             |                 |         |
| 496     | ATP2B3      | 2.77E-03        | 1.3742  |      |             |                 |         |
| 496     | SMN2        | 2.77E-03        | 1.3742  |      |             |                 |         |
| 496     | TBX1        | 2.77E-03        | 1.3742  |      |             |                 |         |
| 496     | SMN1        | 2.77E-03        | 1.3742  |      |             |                 |         |
| 500     | RGS12       | 2.79E-03        | 1.3946  |      |             |                 |         |
| 501     | ZNF268      | 2.90E-03        | 1.4522  |      |             |                 |         |
| 502     | CUEDC1      | 2.92E-03        | 1.4665  |      |             |                 |         |
| 503     | CWC22       | 3.00E-03        | 1.5098  |      |             |                 |         |
| 504     | KCNJ13      | 3.10E-03        | 1.5640  |      |             |                 |         |
| 505     | PAPD4       | 3.12E-03        | 1.5742  |      |             |                 |         |
| 506     | CLIP2       | 3.14E-03        | 1.5887  |      |             |                 |         |
| 507     | SLC5A4      | 3.15E-03        | 1.5960  |      |             |                 |         |
| 508     | TCIRG1      | 3.22E-03        | 1.6368  |      |             |                 |         |
| 509     | ZNF623      | 3.25E-03        | 1.6545  |      |             |                 |         |
| 509     | DNHD1       | 3.25E-03        | 1.6545  |      |             |                 |         |
| 509     | BPI         | 3.25E-03        | 1.6545  |      |             |                 |         |
| 509     | CATSPER2    | 3.25E-03        | 1.6545  |      |             |                 |         |
| 509     | CARKD       | 3.25E-03        | 1.6545  |      |             |                 |         |
| 509     | SYNCRIP     | 3.25E-03        | 1.6545  |      |             |                 |         |
| 509     | SERPINH1    | 3.25E-03        | 1.6545  |      |             |                 |         |
| 516     | SPCS1       | 3.26E-03        | 1.6825  |      |             |                 |         |
| 517     | TMEM40      | 3.27E-03        | 1.6900  |      |             |                 |         |

| 584-A2 |             |                 |          |      |             |                 |          |
|--------|-------------|-----------------|----------|------|-------------|-----------------|----------|
| Rank   | Gene Symbol | p-value [p(wZ)] | E value  | Rank | Gene Symbol | p-value [p(wZ)] | E value  |
| 1      | NAP1L1      | 8.86E-06        | 8.86E-06 | 48   | HNRPDL      | 8.14E-04        | 3.91E-02 |
| 2      | ARHGDI1     | 1.14E-05        | 2.28E-05 | 49   | WAC         | 8.14E-04        | 3.99E-02 |
| 3      | TOX4        | 1.39E-05        | 4.18E-05 | 50   | SBNO1       | 8.16E-04        | 4.08E-02 |
| 4      | PPIL1       | 3.84E-05        | 1.54E-04 | 51   | PPP5C       | 8.17E-04        | 4.17E-02 |
| 5      | MPPED2      | 3.89E-05        | 1.95E-04 | 51   | MCM6        | 8.17E-04        | 4.17E-02 |
| 6      | TTC6        | 7.91E-05        | 4.75E-04 | 53   | IKZF1       | 8.18E-04        | 4.33E-02 |
| 7      | LAMB4       | 8.05E-05        | 5.63E-04 | 54   | LSR         | 8.20E-04        | 4.43E-02 |
| 8      | NRP2        | 8.12E-05        | 6.49E-04 | 55   | MAG         | 8.21E-04        | 4.51E-02 |
| 9      | HFE         | 1.15E-04        | 1.03E-03 | 56   | KLF3        | 8.21E-04        | 4.60E-02 |
| 10     | HOXA3       | 1.17E-04        | 1.17E-03 | 57   | TIMP1       | 8.22E-04        | 4.69E-02 |
| 11     | WDR1        | 1.17E-04        | 1.29E-03 | 58   | CHD1L       | 8.23E-04        | 4.78E-02 |
| 12     | ADAMTS8     | 1.30E-04        | 1.56E-03 | 59   | NKIRAS2     | 8.36E-04        | 4.93E-02 |
| 13     | SEMA6D      | 2.01E-04        | 2.61E-03 | 60   | C14orf119   | 8.36E-04        | 5.01E-02 |
| 14     | SLCO4C1     | 2.23E-04        | 3.12E-03 | 61   | SRP72       | 8.39E-04        | 5.12E-02 |
| 15     | SCOC        | 2.41E-04        | 3.62E-03 | 62   | ACO1        | 8.43E-04        | 5.23E-02 |
| 16     | ZNF460      | 2.61E-04        | 4.17E-03 | 63   | TP63        | 8.47E-04        | 5.33E-02 |
| 17     | EHF         | 2.65E-04        | 4.50E-03 | 64   | C21orf66    | 8.49E-04        | 5.43E-02 |
| 18     | CADM3       | 2.90E-04        | 5.22E-03 | 65   | FARP2       | 8.49E-04        | 5.52E-02 |
| 19     | DNAJC10     | 4.34E-04        | 8.25E-03 | 66   | APOBEC3F    | 8.57E-04        | 5.65E-02 |
| 20     | TRIM5       | 4.51E-04        | 9.02E-03 | 66   | ZNF763      | 8.57E-04        | 5.65E-02 |
| 21     | HLF         | 5.02E-04        | 1.05E-02 | 66   | APOBEC3G    | 8.57E-04        | 5.65E-02 |
| 22     | VPS13A      | 5.22E-04        | 1.15E-02 | 69   | HNRNPU      | 8.77E-04        | 6.05E-02 |
| 23     | KLK13       | 6.70E-04        | 1.54E-02 | 69   | SOS2        | 8.77E-04        | 6.05E-02 |
| 24     | TAF9B       | 7.88E-04        | 1.89E-02 | 71   | NUDT21      | 8.80E-04        | 6.25E-02 |
| 25     | ACVR1C      | 8.02E-04        | 2.00E-02 | 72   | GNRH1       | 8.81E-04        | 6.34E-02 |
| 25     | IGSF1       | 8.02E-04        | 2.00E-02 | 73   | FER         | 9.00E-04        | 6.57E-02 |
| 27     | POLK        | 8.02E-04        | 2.17E-02 | 74   | SCO1        | 9.00E-04        | 6.66E-02 |
| 27     | CREB5       | 8.02E-04        | 2.17E-02 | 75   | ATP11B      | 9.01E-04        | 6.76E-02 |
| 29     | NADK        | 8.02E-04        | 2.33E-02 | 76   | ATRNL1      | 9.06E-04        | 6.88E-02 |
| 30     | MAGT1       | 8.02E-04        | 2.41E-02 | 76   | EID1        | 9.06E-04        | 6.88E-02 |
| 30     | ABHD6       | 8.02E-04        | 2.41E-02 | 78   | SLC2A12     | 9.10E-04        | 7.10E-02 |
| 30     | DNAJC13     | 8.02E-04        | 2.41E-02 | 79   | ACTR10      | 9.15E-04        | 7.23E-02 |
| 33     | SOST        | 8.02E-04        | 2.65E-02 | 79   | DNAL1       | 9.15E-04        | 7.23E-02 |
| 34     | SENP2       | 8.02E-04        | 2.73E-02 | 81   | NT5C1B      | 9.20E-04        | 7.45E-02 |
| 35     | VGLL4       | 8.02E-04        | 2.81E-02 | 82   | P2RY12      | 9.27E-04        | 7.60E-02 |
| 36     | LRP11       | 8.02E-04        | 2.89E-02 | 83   | SSSCA1      | 9.28E-04        | 7.70E-02 |
| 37     | KCNIP4      | 8.03E-04        | 2.97E-02 | 84   | YBX1        | 9.34E-04        | 7.85E-02 |
| 38     | FAM172A     | 8.03E-04        | 3.05E-02 | 85   | FAM122B     | 9.37E-04        | 7.96E-02 |
| 39     | NTN4        | 8.03E-04        | 3.13E-02 | 86   | DPH5        | 9.49E-04        | 8.16E-02 |
| 40     | SMG7        | 8.03E-04        | 3.21E-02 | 87   | RTP4        | 9.50E-04        | 8.26E-02 |
| 41     | KIAA1530    | 8.04E-04        | 3.30E-02 | 88   | INSRR       | 9.69E-04        | 8.53E-02 |
| 42     | IGSF2       | 8.04E-04        | 3.38E-02 | 89   | THUMPD1     | 9.73E-04        | 8.66E-02 |
| 43     | FILIP1L     | 8.05E-04        | 3.46E-02 | 90   | ZSCAN5A     | 9.85E-04        | 8.86E-02 |
| 44     | UIMC1       | 8.07E-04        | 3.55E-02 | 91   | CACNG6      | 9.91E-04        | 9.02E-02 |
| 45     | TBC1D9B     | 8.07E-04        | 3.63E-02 | 92   | HCFC2       | 9.93E-04        | 9.13E-02 |
| 45     | CTSS        | 8.07E-04        | 3.63E-02 | 93   | TNS1        | 1.01E-03        | 9.37E-02 |
| 47     | OR10R2      | 8.11E-04        | 3.81E-02 | 94   | ST8SIA2     | 1.02E-03        | 9.60E-02 |



| 584-A2 |             |                 |          |      |             |                 |         |
|--------|-------------|-----------------|----------|------|-------------|-----------------|---------|
| Rank   | Gene Symbol | p-value [p(wZ)] | E value  | Rank | Gene Symbol | p-value [p(wZ)] | E value |
| 95     | PPPDE1      | 1.02E-03        | 9.72E-02 | 142  | DST         | 1.40E-03        | 0.1993  |
| 96     | LDLRAD2     | 1.03E-03        | 9.85E-02 | 143  | MOBKL1B     | 1.41E-03        | 0.2011  |
| 96     | HSPG2       | 1.03E-03        | 9.85E-02 | 144  | MAP3K6      | 1.41E-03        | 0.2026  |
| 98     | IL1RAPL1    | 1.03E-03        | 0.1012   | 144  | KCTD14      | 1.41E-03        | 0.2026  |
| 99     | SRPK2       | 1.05E-03        | 0.1039   | 144  | NCR1        | 1.41E-03        | 0.2026  |
| 100    | ZMYM4       | 1.07E-03        | 0.1072   | 147  | ABCB1       | 1.41E-03        | 0.2075  |
| 101    | RNF122      | 1.08E-03        | 0.1091   | 147  | ABCB4       | 1.41E-03        | 0.2075  |
| 101    | ROBO3       | 1.08E-03        | 0.1091   | 149  | TMCC1       | 1.44E-03        | 0.2142  |
| 101    | MPP7        | 1.08E-03        | 0.1091   | 150  | MAPK1IP1L   | 1.44E-03        | 0.2161  |
| 104    | NF2         | 1.08E-03        | 0.1126   | 151  | MYO1B       | 1.47E-03        | 0.2213  |
| 104    | GNA12       | 1.08E-03        | 0.1126   | 152  | FLRT1       | 1.47E-03        | 0.2240  |
| 106    | EIF5B       | 1.08E-03        | 0.1150   | 153  | HBG2        | 1.49E-03        | 0.2284  |
| 107    | FBXO28      | 1.09E-03        | 0.1166   | 153  | HBG1        | 1.49E-03        | 0.2284  |
| 108    | SDCCAG10    | 1.09E-03        | 0.1179   | 155  | TKTL2       | 1.51E-03        | 0.2343  |
| 109    | NRXN3       | 1.09E-03        | 0.1192   | 156  | ILF3        | 1.51E-03        | 0.2360  |
| 110    | USP21       | 1.10E-03        | 0.1206   | 157  | CAPRIN2     | 1.52E-03        | 0.2388  |
| 110    | ZNF781      | 1.10E-03        | 0.1206   | 158  | ASMTL       | 1.56E-03        | 0.2458  |
| 110    | PKD2L1      | 1.10E-03        | 0.1206   | 159  | TBX10       | 1.57E-03        | 0.2498  |
| 113    | ETV1        | 1.10E-03        | 0.1242   | 159  | PPBP        | 1.57E-03        | 0.2498  |
| 114    | EXOSC2      | 1.11E-03        | 0.1263   | 159  | PMP2        | 1.57E-03        | 0.2498  |
| 115    | ISCA1       | 1.11E-03        | 0.1278   | 159  | ARF3        | 1.57E-03        | 0.2498  |
| 116    | DAB2        | 1.12E-03        | 0.1296   | 163  | FAM149A     | 1.59E-03        | 0.2589  |
| 117    | TMEM155     | 1.13E-03        | 0.1327   | 164  | CALCA       | 1.61E-03        | 0.2637  |
| 118    | DYRK4       | 1.14E-03        | 0.1339   | 165  | PARK7       | 1.62E-03        | 0.2680  |
| 119    | GRK4        | 1.15E-03        | 0.1365   | 166  | KIAA0284    | 1.66E-03        | 0.2750  |
| 120    | TRIB2       | 1.16E-03        | 0.1390   | 167  | DPPA4       | 1.68E-03        | 0.2798  |
| 121    | PANX2       | 1.18E-03        | 0.1425   | 167  | PFTK2       | 1.68E-03        | 0.2798  |
| 122    | NUCKS1      | 1.18E-03        | 0.1439   | 169  | MED24       | 1.74E-03        | 0.2948  |
| 123    | KDELC1      | 1.18E-03        | 0.1451   | 170  | FLT3LG      | 1.76E-03        | 0.2989  |
| 124    | PFKFB2      | 1.19E-03        | 0.1475   | 171  | PAX8        | 1.77E-03        | 0.3020  |
| 125    | SURF1       | 1.21E-03        | 0.1513   | 172  | PTGDR       | 1.80E-03        | 0.3087  |
| 126    | AQP1        | 1.21E-03        | 0.1530   | 172  | CRMP1       | 1.80E-03        | 0.3087  |
| 127    | PALM2-AKAP2 | 1.25E-03        | 0.1582   | 174  | TMPRSS2     | 1.85E-03        | 0.3226  |
| 127    | AKAP2       | 1.25E-03        | 0.1582   | 175  | HS6ST1      | 1.93E-03        | 0.3371  |
| 129    | RAD1        | 1.25E-03        | 0.1609   | 175  | PRB4        | 1.93E-03        | 0.3371  |
| 130    | C15orf54    | 1.26E-03        | 0.1643   | 175  | NCOA7       | 1.93E-03        | 0.3371  |
| 130    | RPL14       | 1.26E-03        | 0.1643   | 175  | FYCO1       | 1.93E-03        | 0.3371  |
| 132    | C10orf92    | 1.30E-03        | 0.1713   | 175  | PRB3        | 1.93E-03        | 0.3371  |
| 133    | PLEKHG6     | 1.32E-03        | 0.1753   | 180  | CD37        | 1.93E-03        | 0.3469  |
| 134    | BMPR2       | 1.35E-03        | 0.1803   | 181  | METTTL11A   | 1.95E-03        | 0.3522  |
| 135    | LECT2       | 1.35E-03        | 0.1821   | 182  | COQ3        | 1.98E-03        | 0.3596  |
| 136    | LIMA1       | 1.37E-03        | 0.1859   | 183  | DNAJC4      | 1.99E-03        | 0.3635  |
| 137    | RBBP6       | 1.38E-03        | 0.1884   | 184  | ZXDC        | 2.08E-03        | 0.3828  |
| 137    | IQGAP3      | 1.38E-03        | 0.1884   | 185  | C6orf106    | 2.12E-03        | 0.3916  |
| 137    | PPP2R2D     | 1.38E-03        | 0.1884   | 186  | UQCC        | 2.12E-03        | 0.3942  |
| 137    | CHAC2       | 1.38E-03        | 0.1884   | 187  | ATG12       | 2.14E-03        | 0.3998  |
| 141    | VCAN        | 1.40E-03        | 0.1973   | 188  | C14orf126   | 2.14E-03        | 0.4025  |

| 584-A2 |             |                 |         |      |             |                 |         |
|--------|-------------|-----------------|---------|------|-------------|-----------------|---------|
| Rank   | Gene Symbol | p-value [p(wZ)] | E value | Rank | Gene Symbol | p-value [p(wZ)] | E value |
| 189    | TMED2       | 2.17E-03        | 0.4097  | 236  | STARD10     | 3.29E-03        | 0.7767  |
| 190    | KIAA0467    | 2.19E-03        | 0.4163  | 237  | NEIL3       | 3.32E-03        | 0.7863  |
| 191    | TMC5        | 2.23E-03        | 0.4254  | 238  | TMLHE       | 3.33E-03        | 0.7914  |
| 192    | RPA1        | 2.24E-03        | 0.4307  | 239  | AGFG1       | 3.46E-03        | 0.8263  |
| 193    | IKZF2       | 2.27E-03        | 0.4372  | 240  | FMR1        | 3.48E-03        | 0.8340  |
| 194    | MUTYH       | 2.29E-03        | 0.4438  | 241  | TMEM49      | 3.53E-03        | 0.8495  |
| 194    | ACSL6       | 2.29E-03        | 0.4438  | 241  | USP38       | 3.53E-03        | 0.8495  |
| 196    | LUZP2       | 2.33E-03        | 0.4566  | 241  | KCTD20      | 3.53E-03        | 0.8495  |
| 196    | HPS6        | 2.33E-03        | 0.4566  | 241  | PLAC8       | 3.53E-03        | 0.8495  |
| 198    | PSRC1       | 2.34E-03        | 0.4638  | 245  | TAF11       | 3.57E-03        | 0.8744  |
| 199    | ZNF562      | 2.38E-03        | 0.4745  | 245  | UHRF1BP1    | 3.57E-03        | 0.8744  |
| 200    | TMEM9       | 2.40E-03        | 0.4797  | 247  | TGFB3       | 3.59E-03        | 0.8875  |
| 200    | LIFR        | 2.40E-03        | 0.4797  | 248  | ALB         | 3.61E-03        | 0.8962  |
| 202    | ACE2        | 2.40E-03        | 0.4845  | 249  | PSMD6       | 3.76E-03        | 0.9364  |
| 203    | YPEL1       | 2.50E-03        | 0.5069  | 249  | RPRD1A      | 3.76E-03        | 0.9364  |
| 203    | TLR10       | 2.50E-03        | 0.5069  | 249  | MED16       | 3.76E-03        | 0.9364  |
| 203    | CDC37       | 2.50E-03        | 0.5069  | 252  | TOMM70A     | 3.84E-03        | 0.9666  |
| 203    | ARPC4       | 2.50E-03        | 0.5069  | 253  | DSN1        | 3.85E-03        | 0.9737  |
| 203    | EIF4G1      | 2.50E-03        | 0.5069  | 253  | SP100       | 3.85E-03        | 0.9737  |
| 203    | ADM2        | 2.50E-03        | 0.5069  | 253  | EFCAB2      | 3.85E-03        | 0.9737  |
| 203    | APOBEC3C    | 2.50E-03        | 0.5069  | 253  | RAD21       | 3.85E-03        | 0.9737  |
| 210    | C12orf65    | 2.52E-03        | 0.5297  | 257  | RNGTT       | 3.88E-03        | 0.9969  |
| 210    | EPB41L2     | 2.52E-03        | 0.5297  | 258  | SPTBN1      | 4.03E-03        | 1.0408  |
| 212    | C19orf6     | 2.53E-03        | 0.5373  | 259  | PI4K2A      | 4.04E-03        | 1.0459  |
| 212    | DEFA5       | 2.53E-03        | 0.5373  | 260  | KLRG1       | 4.08E-03        | 1.0598  |
| 214    | NDRG3       | 2.55E-03        | 0.5465  | 261  | KIAA1217    | 4.13E-03        | 1.0789  |
| 215    | METTL2A     | 2.59E-03        | 0.5575  | 261  | SH3BP4      | 4.13E-03        | 1.0789  |
| 216    | SOX2        | 2.60E-03        | 0.5624  | 263  | VANGL1      | 4.21E-03        | 1.1078  |
| 217    | RGS3        | 2.69E-03        | 0.5839  | 264  | FGF1        | 4.22E-03        | 1.1153  |
| 218    | MED28       | 2.72E-03        | 0.5933  | 265  | ANKRD20A3   | 4.23E-03        | 1.1221  |
| 219    | SLC26A1     | 2.77E-03        | 0.6077  | 265  | RHEBL1      | 4.23E-03        | 1.1221  |
| 220    | AFTPH       | 2.79E-03        | 0.6142  | 265  | ANKRD20A1   | 4.23E-03        | 1.1221  |
| 221    | PPIL2       | 2.81E-03        | 0.6213  | 265  | ANKRD20A2   | 4.23E-03        | 1.1221  |
| 222    | RBM6        | 2.83E-03        | 0.6273  | 269  | EDA         | 4.26E-03        | 1.1448  |
| 222    | C3orf37     | 2.83E-03        | 0.6273  | 270  | TCEAL2      | 4.31E-03        | 1.1642  |
| 224    | TFAM        | 2.83E-03        | 0.6335  | 270  | C16orf58    | 4.31E-03        | 1.1642  |
| 225    | CNOT2       | 2.83E-03        | 0.6373  | 270  | ETNK1       | 4.31E-03        | 1.1642  |
| 226    | SDCCAG1     | 2.86E-03        | 0.6462  | 273  | PRKCE       | 4.36E-03        | 1.1893  |
| 226    | ANKRD12     | 2.86E-03        | 0.6462  | 274  | TMEM27      | 4.36E-03        | 1.1960  |
| 226    | TNFSF13B    | 2.86E-03        | 0.6462  | 275  | RYR1        | 4.60E-03        | 1.2643  |
| 229    | SLC16A3     | 2.95E-03        | 0.6763  | 276  | PIK3C3      | 4.64E-03        | 1.2807  |
| 230    | NRXN1       | 3.10E-03        | 0.7127  | 276  | SAC3D1      | 4.64E-03        | 1.2807  |
| 231    | FSCN3       | 3.16E-03        | 0.7302  | 276  | RRP15       | 4.64E-03        | 1.2807  |
| 232    | SFRP1       | 3.17E-03        | 0.7346  | 279  | ADH4        | 4.72E-03        | 1.3161  |
| 233    | SPDEF       | 3.21E-03        | 0.7486  | 280  | OLFML2A     | 4.72E-03        | 1.3215  |
| 234    | ETV4        | 3.22E-03        | 0.7529  | 281  | NFIB        | 4.76E-03        | 1.3367  |
| 235    | ABI3        | 3.28E-03        | 0.7710  | 282  | RPS11       | 4.76E-03        | 1.3415  |

Singleton, Kim, Hinz, Marek, Casas-Selves, Hatheway, Tan, DeGregori and Heasley. A Receptor Tyrosine Kinase Network Comprised of FGFRs, EGFR, ERBB2 and MET Drives Growth and Survival of Head and Neck Squamous Carcinoma Cell Lines. MOLPHARM #084111

| 584-A2 |             |                 |         |
|--------|-------------|-----------------|---------|
| Rank   | Gene Symbol | p-value [p(wZ)] | E value |
| 282    | FUT4        | 4.76E-03        | 1.3415  |
| 282    | POP4        | 4.76E-03        | 1.3415  |
| 282    | RPL9        | 4.76E-03        | 1.3415  |
| 282    | KIF18A      | 4.76E-03        | 1.3415  |
| 287    | KBTBD4      | 4.86E-03        | 1.3952  |
| 288    | SEMA4G      | 4.91E-03        | 1.4149  |
| 289    | 7-Mar       | 4.92E-03        | 1.4214  |
| 289    | SF3A2       | 4.92E-03        | 1.4214  |
| 291    | UBE2J1      | 4.97E-03        | 1.4469  |
| 292    | PRICKLE4    | 5.03E-03        | 1.4681  |
| 293    | CHD7        | 5.09E-03        | 1.4922  |
| 294    | MCM10       | 5.10E-03        | 1.4985  |
| 295    | TRAM1       | 5.17E-03        | 1.5254  |
| 296    | CA11        | 5.26E-03        | 1.5571  |
| 296    | MFF         | 5.26E-03        | 1.5571  |
| 296    | ALDH4A1     | 5.26E-03        | 1.5571  |
| 296    | TNKS        | 5.26E-03        | 1.5571  |
| 296    | PIGO        | 5.26E-03        | 1.5571  |
| 296    | TFPI2       | 5.26E-03        | 1.5571  |
| 296    | RAB7A       | 5.26E-03        | 1.5571  |
| 296    | ADAM12      | 5.26E-03        | 1.5571  |
| 296    | MAPK8IP3    | 5.26E-03        | 1.5571  |
| 296    | ZFP82       | 5.26E-03        | 1.5571  |
| 296    | PLEK2       | 5.26E-03        | 1.5571  |
| 307    | CTSZ        | 5.27E-03        | 1.6174  |
| 308    | MTMR1       | 5.28E-03        | 1.6257  |
| 309    | PER2        | 5.31E-03        | 1.6408  |
| 310    | NF1         | 5.32E-03        | 1.6490  |
| 311    | PDZD11      | 5.52E-03        | 1.7174  |
| 312    | TCEA1       | 5.53E-03        | 1.7264  |
| 313    | C16orf35    | 5.55E-03        | 1.7370  |
| 314    | SLC6A12     | 5.61E-03        | 1.7613  |
| 315    | RAP2B       | 5.75E-03        | 1.8107  |
| 316    | PSMF1       | 5.76E-03        | 1.8197  |
| 317    | PROL1       | 5.79E-03        | 1.8340  |
| 318    | KBTBD10     | 5.84E-03        | 1.8579  |
| 319    | STRN        | 5.90E-03        | 1.8814  |
| 320    | TRIM38      | 5.93E-03        | 1.8974  |
| 321    | KIAA0020    | 5.94E-03        | 1.9080  |
| 322    | NPAL2       | 6.01E-03        | 1.9348  |
| 323    | UBAP2L      | 6.08E-03        | 1.9650  |
| 324    | OAS2        | 6.14E-03        | 1.9878  |
| 324    | EPPK1       | 6.14E-03        | 1.9878  |
| 324    | COL14A1     | 6.14E-03        | 1.9878  |

Singleton, Kim, Hinz, Marek, Casas-Selves, Hatheway, Tan, DeGregori and Heasley. A Receptor Tyrosine Kinase Network Comprised of FGFRs, EGFR, ERBB2 and MET Drives Growth and Survival of Head and Neck Squamous Carcinoma Cell Lines. MOLPHARM #084111

| CCL30 |             |                 |          |      |             |                 |         |
|-------|-------------|-----------------|----------|------|-------------|-----------------|---------|
| Rank  | Gene Symbol | p-value [p(wZ)] | E value  | Rank | Gene Symbol | p-value [p(wZ)] | E value |
| 1     | BCLAF1      | 9.25E-04        | 9.25E-04 | 48   | VNN2        | 6.65E-03        | 0.3190  |
| 2     | FN1         | 1.14E-03        | 2.27E-03 | 49   | MPPED2      | 6.75E-03        | 0.3310  |
| 3     | FGF2        | 1.23E-03        | 3.70E-03 | 50   | YWHAZ       | 6.87E-03        | 0.3437  |
| 4     | LRPPRC      | 2.05E-03        | 8.20E-03 | 51   | CBX4        | 7.01E-03        | 0.3575  |
| 5     | GAPDH       | 2.09E-03        | 1.05E-02 | 52   | ESR2        | 7.08E-03        | 0.3681  |
| 6     | ATP6AP2     | 2.18E-03        | 1.31E-02 | 53   | PTP4A1      | 7.21E-03        | 0.3822  |
| 7     | DBF4        | 2.22E-03        | 1.55E-02 | 54   | TMED2       | 7.29E-03        | 0.3934  |
| 8     | GYG1        | 2.29E-03        | 1.83E-02 | 55   | RPL22       | 7.30E-03        | 0.4013  |
| 9     | AK2         | 2.42E-03        | 2.18E-02 | 56   | CLUL1       | 7.40E-03        | 0.4143  |
| 10    | IL5RA       | 2.44E-03        | 2.44E-02 | 57   | CSNK2A1     | 7.41E-03        | 0.4226  |
| 11    | OTUB2       | 2.57E-03        | 2.82E-02 | 58   | MAX         | 7.72E-03        | 0.4478  |
| 12    | CSF2        | 2.57E-03        | 3.09E-02 | 59   | SGK1        | 7.81E-03        | 0.4608  |
| 13    | CHD4        | 2.59E-03        | 3.37E-02 | 60   | RAP2B       | 8.03E-03        | 0.4821  |
| 14    | PAX8        | 2.61E-03        | 3.66E-02 | 61   | HMG20B      | 8.19E-03        | 0.4998  |
| 15    | LPIN1       | 3.01E-03        | 4.51E-02 | 62   | PPP1CB      | 8.23E-03        | 0.5100  |
| 16    | DKK3        | 3.04E-03        | 4.86E-02 | 63   | PDE8A       | 8.26E-03        | 0.5207  |
| 17    | FABP4       | 3.06E-03        | 5.21E-02 | 64   | RUNX1       | 8.35E-03        | 0.5343  |
| 18    | PEX5        | 3.23E-03        | 5.81E-02 | 65   | KCNK7       | 8.38E-03        | 0.5445  |
| 19    | EEF1E1      | 3.30E-03        | 6.27E-02 | 66   | RRH         | 8.47E-03        | 0.5587  |
| 20    | TRIM44      | 3.60E-03        | 7.21E-02 | 67   | FXR1        | 8.62E-03        | 0.5773  |
| 21    | CXCR6       | 3.73E-03        | 7.84E-02 | 68   | KLHL20      | 8.85E-03        | 0.6019  |
| 22    | LSM14A      | 3.74E-03        | 8.24E-02 | 69   | CASP1       | 8.85E-03        | 0.6110  |
| 23    | DNAJC6      | 3.86E-03        | 8.89E-02 | 70   | SDF4        | 9.23E-03        | 0.6463  |
| 24    | RPS7        | 4.11E-03        | 9.85E-02 | 71   | IPO8        | 9.25E-03        | 0.6564  |
| 25    | MAPK9       | 4.16E-03        | 0.1039   | 72   | EPB41L3     | 9.76E-03        | 0.7024  |
| 26    | DYNC1LI2    | 4.17E-03        | 0.1084   | 73   | CCDC6       | 9.90E-03        | 0.7226  |
| 27    | SERPINB3    | 4.32E-03        | 0.1165   | 74   | TUBA1A      | 9.94E-03        | 0.7358  |
| 28    | C1QBP       | 4.38E-03        | 0.1227   | 75   | DNAJC24     | 9.96E-03        | 0.7471  |
| 29    | PDCD10      | 4.50E-03        | 0.1306   | 76   | ZMYND11     | 1.01E-02        | 0.7654  |
| 30    | VIPR2       | 4.73E-03        | 0.1418   | 77   | HYAL1       | 1.02E-02        | 0.7861  |
| 31    | CSRP2       | 5.06E-03        | 0.1568   | 78   | MALT1       | 1.05E-02        | 0.8172  |
| 32    | EZR         | 5.06E-03        | 0.1620   | 79   | SIKE        | 1.06E-02        | 0.8369  |
| 33    | RBM15B      | 5.10E-03        | 0.1682   | 80   | TRIM8       | 1.10E-02        | 0.8769  |
| 34    | KCNA3       | 5.16E-03        | 0.1754   | 81   | ZNF208      | 1.10E-02        | 0.8895  |
| 35    | THAP4       | 5.16E-03        | 0.1807   | 82   | FAM83E      | 1.12E-02        | 0.9157  |
| 36    | SLC35B1     | 5.21E-03        | 0.1875   | 83   | CCR3        | 1.13E-02        | 0.9343  |
| 37    | TPT1        | 5.27E-03        | 0.1949   | 84   | CSTF2T      | 1.14E-02        | 0.9572  |
| 38    | PGM1        | 5.37E-03        | 0.2039   | 85   | PSG9        | 1.15E-02        | 0.9792  |
| 39    | SFRS10      | 5.56E-03        | 0.2168   | 86   | NUP50       | 1.16E-02        | 0.9994  |
| 40    | TLE4        | 5.76E-03        | 0.2305   | 87   | CYP2C18     | 1.17E-02        | 1.0149  |
| 41    | CLIC2       | 5.89E-03        | 0.2414   | 88   | CACYBP      | 1.19E-02        | 1.0451  |
| 42    | NRXN1       | 5.94E-03        | 0.2494   | 89   | C1orf116    | 1.19E-02        | 1.0597  |
| 43    | KPNA4       | 6.01E-03        | 0.2584   | 90   | SH2B3       | 1.19E-02        | 1.0726  |
| 44    | ATP6V0E1    | 6.24E-03        | 0.2746   | 91   | DBT         | 1.21E-02        | 1.0994  |
| 45    | HIST1H2AE   | 6.26E-03        | 0.2817   | 92   | UBE2L3      | 1.23E-02        | 1.1344  |
| 46    | PCDHGA1     | 6.44E-03        | 0.2963   | 93   | ZFP106      | 1.24E-02        | 1.1577  |
| 47    | TMPRSS5     | 6.44E-03        | 0.3028   | 94   | GBF1        | 1.25E-02        | 1.1738  |

Singleton, Kim, Hinz, Marek, Casas-Selves, Hatheway, Tan, DeGregori and Heasley. A Receptor Tyrosine Kinase Network Comprised of FGFRs, EGFR, ERBB2 and MET Drives Growth and Survival of Head and Neck Squamous Carcinoma Cell Lines. MOLPHARM #084111

| <b>CCL30</b> |                    |                        |                |
|--------------|--------------------|------------------------|----------------|
| <b>Rank</b>  | <b>Gene Symbol</b> | <b>p-value [p(wZ)]</b> | <b>E value</b> |
| 95           | TRIM2              | 1.27E-02               | 1.2025         |
| 96           | FGF3               | 1.29E-02               | 1.2339         |
| 97           | FGFR3              | 1.29E-02               | 1.2541         |
| 98           | GTF3C2             | 1.30E-02               | 1.2729         |
| 99           | GPBP1L1            | 1.31E-02               | 1.3003         |
| 100          | PCDH12             | 1.34E-02               | 1.3366         |
| 101          | MOBK1B             | 1.34E-02               | 1.3530         |
| 102          | PTEN               | 1.37E-02               | 1.4023         |
| 103          | GCN1L1             | 1.38E-02               | 1.4205         |
| 104          | EIF5B              | 1.40E-02               | 1.4509         |
| 105          | TMSL3              | 1.40E-02               | 1.4693         |
| 105          | TMSB4X             | 1.40E-02               | 1.4693         |
| 107          | GLUL               | 1.41E-02               | 1.5096         |
| 108          | ZFX                | 1.42E-02               | 1.5361         |
| 109          | DNAJC13            | 1.42E-02               | 1.5506         |
| 110          | ZNF217             | 1.43E-02               | 1.5778         |
| 111          | PAFAH2             | 1.45E-02               | 1.6143         |
| 112          | KIF5B              | 1.46E-02               | 1.6339         |
| 113          | XPNPEP1            | 1.46E-02               | 1.6513         |
| 114          | TMEM30B            | 1.47E-02               | 1.6760         |
| 115          | IRF9               | 1.48E-02               | 1.6977         |
| 116          | KCNJ1              | 1.50E-02               | 1.7385         |
| 117          | GCDH               | 1.50E-02               | 1.7539         |
| 118          | PGM3               | 1.55E-02               | 1.8277         |
| 119          | USP9X              | 1.56E-02               | 1.8522         |
| 120          | PI4K2A             | 1.60E-02               | 1.9189         |
| 121          | AKAP4              | 1.63E-02               | 1.9689         |
| 122          | PHTF1              | 1.63E-02               | 1.9873         |

**SUPPLEMENTAL FIGURE 1: Dose response of cell lines to RTK inhibition. The**

indicated cell lines were treated with AZ8010 (A, B), AZ8931 (A, C) or PF1066 (A, D) at a range of doses and proliferation was measured by CyQuant assay. The IC<sub>50</sub> was calculated for each inhibitor and cell line.

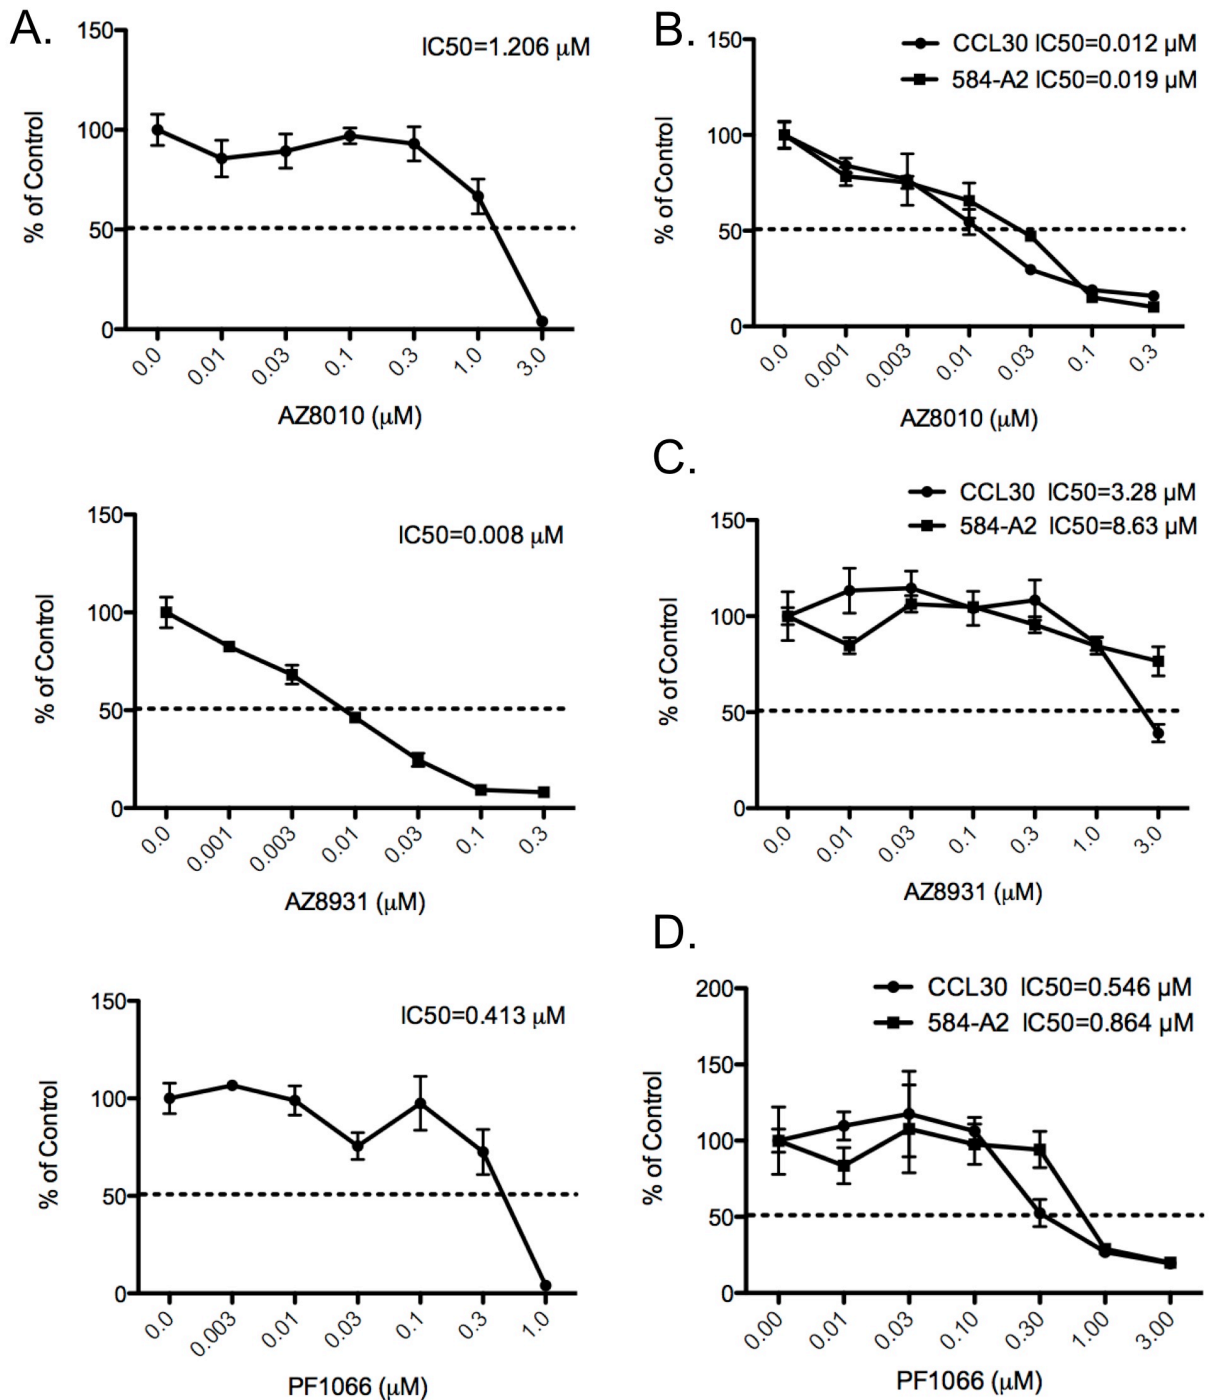

**SUPPLEMENTAL FIGURE 2: Unsupervised hierarchical clustering of replicates and treatment groups within cell lines treated with AZ8010.**

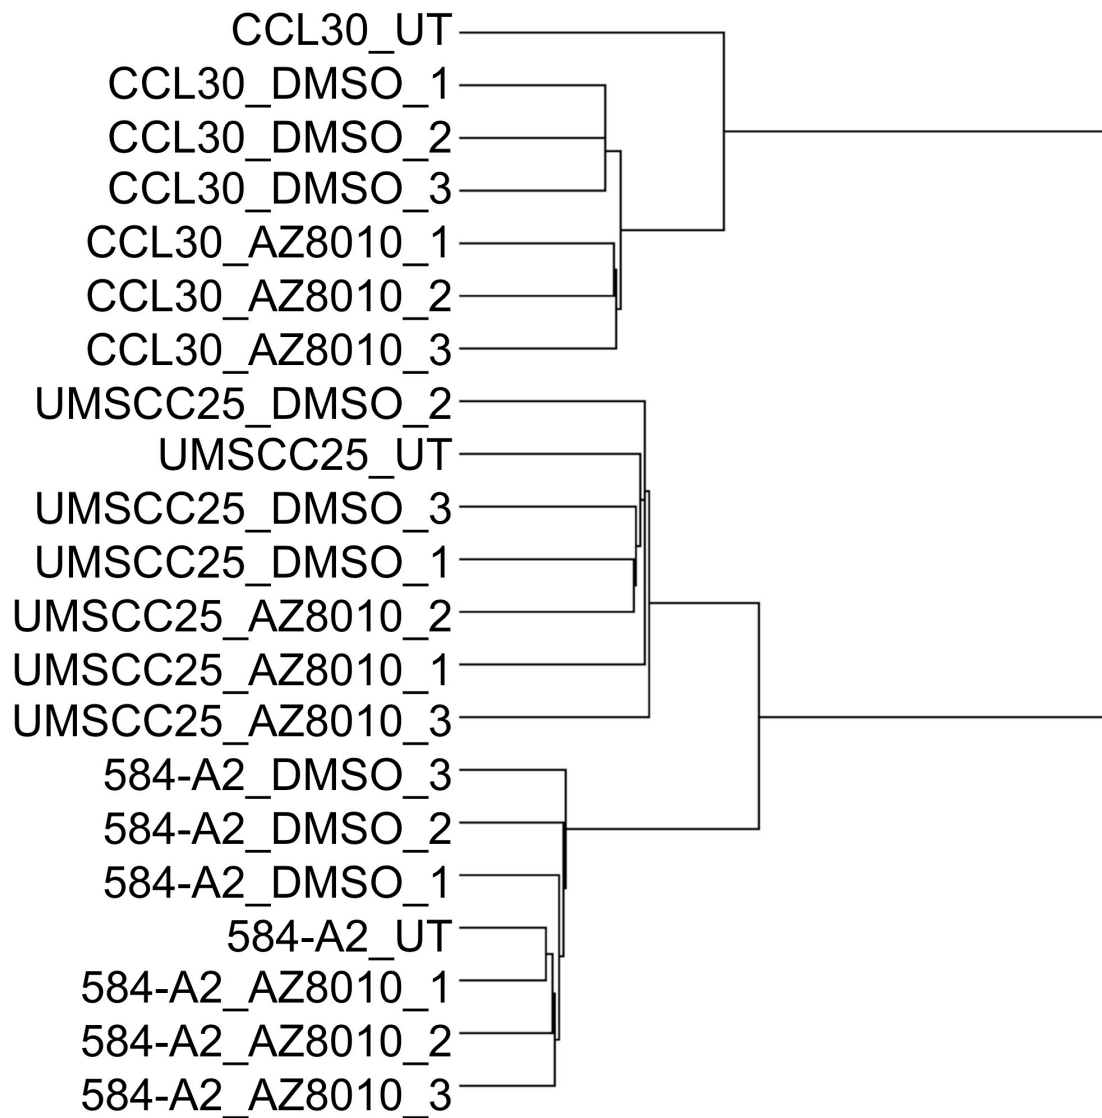

**SUPPLEMENTAL FIGURE 3: Overlap of SLATs between cell lines.** The figure

displays the number of SLATs identified in common between UMSCC25, 584-A2 and CCL30 cells and their gene names. Note that no SLAT was identified in all three cell lines.

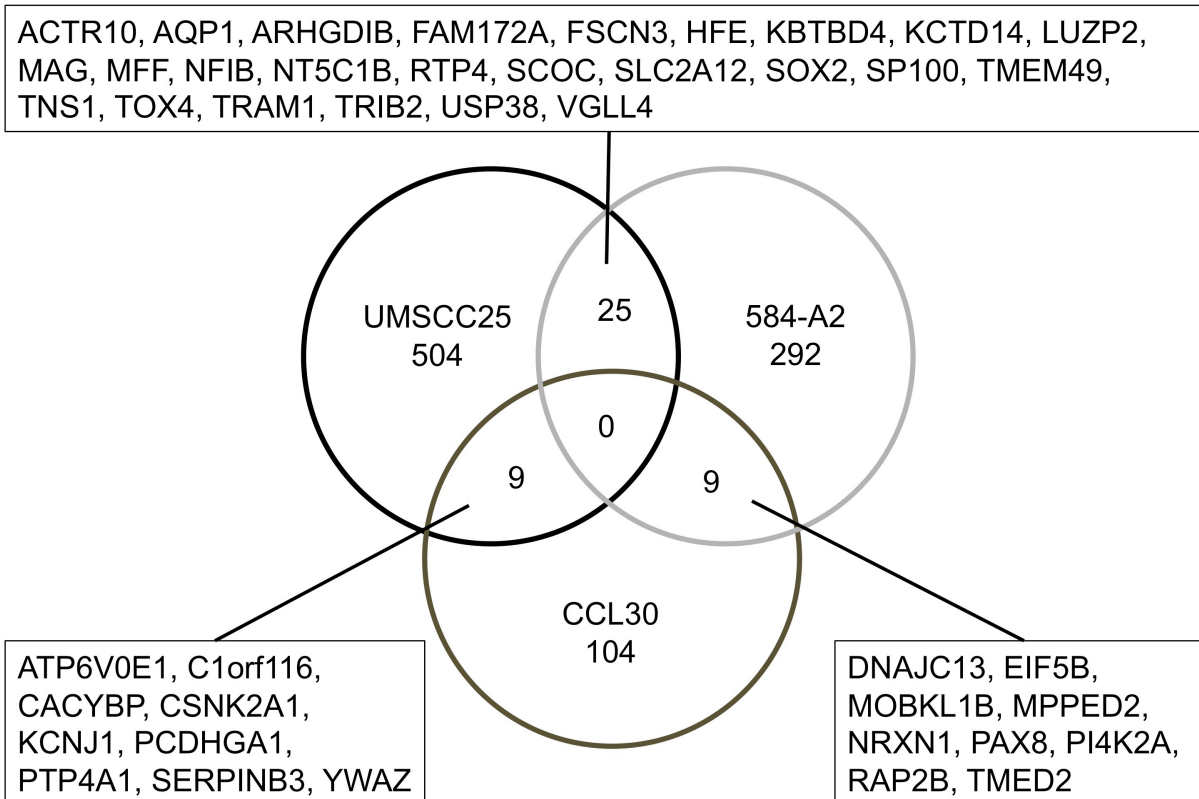





## **SUPPLEMENTAL FIGURE 5: Combined inhibition of FGFR and ERBB family**

**members by the TKI, lapatinib, leads to impairment of cell line growth.** The cell

lines indicated were treated in triplicate with DMSO, 0.1  $\mu\text{M}$  lapatinib, 0.5  $\mu\text{M}$  labatinib

alone or in combination with the indicated doses of AZ8010. The effects of the treatment

on cell growth were measured by clonogenic assay (UMSCC25, 584-A2) or anchorage

independent growth assay (CCL30). Statistical analysis using a two-tailed Student's t-

test was used to show significant differences in growth where ns indicates not

significant, \* indicates  $p < 0.05$ , \*\* indicates  $p < 0.005$ .

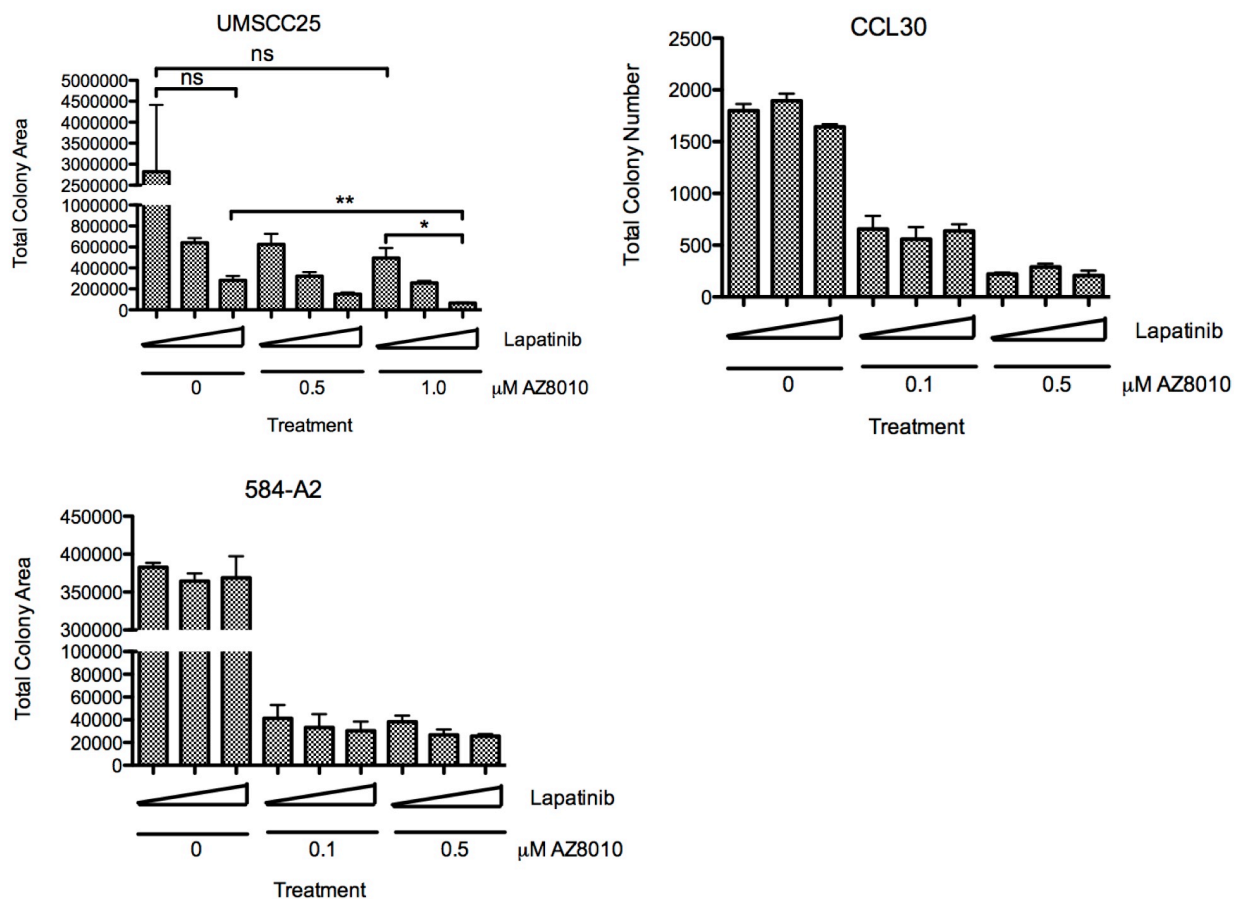

**SUPPLEMENTAL FIGURE 6: Knockdown of ERBB2 or MET inhibits growth of two**

**HNSCC cell lines and improves response to AZ8010 treatment. A)** Pooled UMSCC1

or UMSCC8 cells expressing either a negative control shRNA targeting GFP or two independent shRNAs targeting ERBB2 were measured for ERBB2 protein expression by immunoblot. The protein level of the  $\alpha$ -subunit of Na/K-ATPase was measured by

immunoblot as a loading control. **B)** Pooled UMSCC1 cells expressing the control shRNA or one of two shRNAs targeting ERBB2 were used in triplicate in a clonogenic growth assay in the presence or absence of 1.0  $\mu$ M AZ8010. **C)** Pooled UMSCC8 cells

expressing the control shRNA or one of two shRNAs targeting ERBB2 were used in triplicate in a clonogenic growth assay in the presence or absence of 1.0  $\mu$ M AZ8010.

**D)** Pooled UMSCC1 or UMSCC8 cells expressing either a negative control shRNA targeting GFP or two independent shRNAs targeting MET were measured for MET protein expression by immunoblot. The protein level of the  $\alpha$ -subunit of Na/K-ATPase

was measured by immunoblot as a loading control. **E)** Pooled UMSCC1 cells expressing the control shRNA or one of two shRNAs targeting MET were used in triplicate in a clonogenic growth assay in the presence or absence of 1.0  $\mu$ M AZ8010.

After two weeks, colonies were stained and quantified as described in the Materials and

Methods. **F)** Pooled UMSCC8 cells expressing the control shRNA or one of two shRNAs targeting MET were used in triplicate in a clonogenic growth assay in the

presence or absence of 1.0  $\mu$ M AZ8010. After two weeks, colonies were stained and quantified as described in the Materials and Methods. Data are the means and SEM of

three independent experiments. Statistical analysis using a two-tailed Student's t-test

was used to show significant differences in growth where ns indicates not significant, \*

indicates  $p < 0.05$ , \*\* indicates  $p < 0.005$ , \*\*\* indicates  $p < 0.0005$  and \*\*\*\* indicates

$p < 0.0001$ .

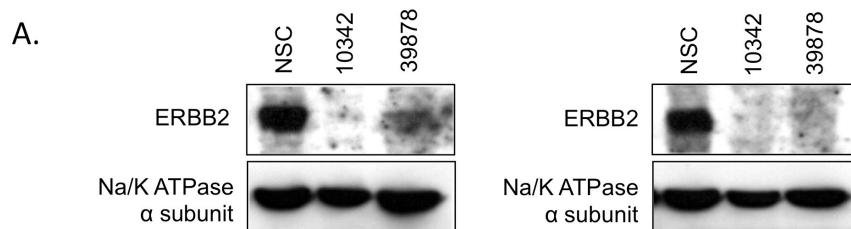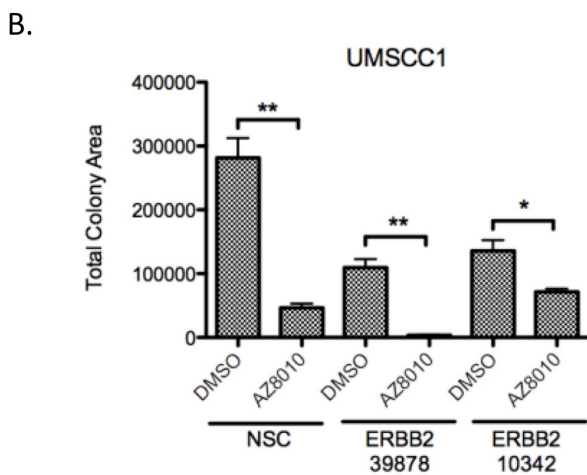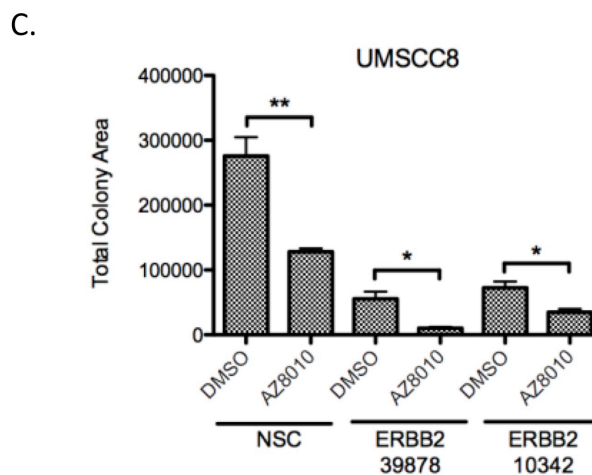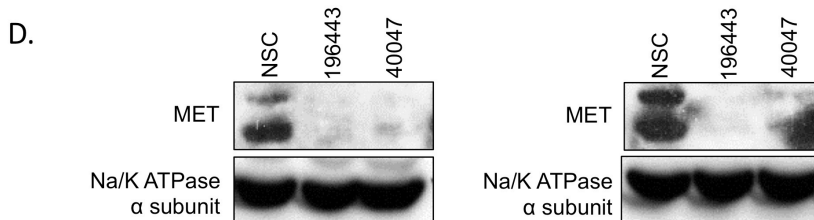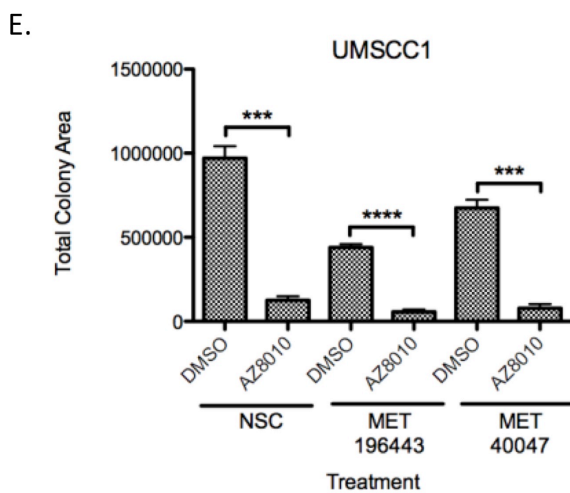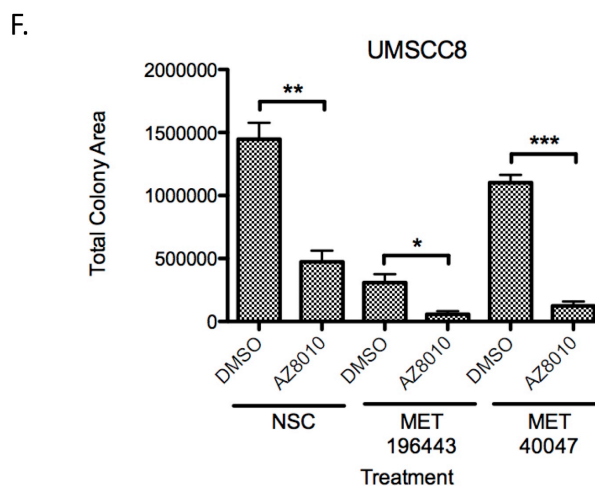

Supplement: SingletonSuppFigures.pdf [file SingletonSuppFigures.pdf]
